# Supplementary material for: Rare and Frequent Promoter Methylation, Respectively, of TSHZ2 and 3 Genes That Are Both Downregulated in Expression in Breast and Prostate Cancers
Source: PubMed Central journal article supplement (PMC3056709; doi:10.1371/journal.pone.0017149), 2011-03-14
Supplement: pone.0017149.s001.pdf [file pone.0017149.s001.pdf]

| Set                 | Gene Name     | Primer 1 Sequence               | Primer 2 Sequence                 | Fragment Size (bp)        | Primer Conc'n (nM) |
|---------------------|---------------|---------------------------------|-----------------------------------|---------------------------|--------------------|
| 1                   | <b>HOXA6</b>  | GAGCGCCAGATCAAGATCTGGTT         | CTCCCCTGAAGCTGCGGAAGCCCC          | 240                       | 45                 |
|                     | <b>HOXA9</b>  | GAGAGGCAGGTCAAGATCTGGTT         | GAGGTTTAGAGCCGCTTTGTGCG           | 217                       | 45                 |
|                     | <b>HOXA7</b>  | GAGCGCCAGATTAAGATCTGGTT         | GGCCCCGGATCGGCCCTCATTC            | 200                       | 227                |
|                     | <b>HOXA2</b>  | GAGAGACAAGTGAAAGTGTGGTT         | AGAAGGGCCCCAGAGACGCTAAG           | 182                       | 91                 |
|                     | <b>HOXA5</b>  | TTGCCTCTCCGAGAGACAAATTAATCTGGTT | ACTGACACTACGCGGGATCCGCTAATA       | 173                       | 159                |
|                     | <b>HOXA10</b> | ACGGACAGACAAGTGAAAATCTGGTT      | GGAAGTGAAAAAACCGCGTCGCCTGG        | 141                       | 45                 |
|                     | <b>HOXA13</b> | GAGCGGCAGGTCAAAATCTGGTT         | TTCTGAAGCGTTTCTCAAGTTGCCTTCTTGC   | 128                       | 45                 |
|                     | <b>HOXA4</b>  | GAGCGCCAGGTCAAGATCTGGTT         | CTTTCCCTGGTGGGCCGGCAGAGGC         | 124                       | 45                 |
|                     | <b>HOXA1</b>  | GAGACCAAGTGAAGATCTGGTT          | CCTTCTCGTCGTTTCTGGCG              | 112                       | 45                 |
|                     | <b>HOXA3</b>  | GAGCGCCAGATCAAGATCTGGTT         | CTTGGAGACTGGCCCCCGAT              | 101                       | 45                 |
|                     | <b>HOXA11</b> | GATCGTCAAGTCAAAATCTGGTT         | TGGATTTGCTGAGTAGTACTGTAAACG       | 90                        | 159                |
| 2                   | <b>HOXB3</b>  | GAGCGGCAGATCAAGATCTGGTT         | GGTAGTTGGAGGGCAGCGCTAG            | 241                       | 75                 |
|                     | <b>HOXB5</b>  | GAGCGCCAGATCAAGATCTGGTT         | GCAGGCTTGTGGGAACCGGTC             | 220                       | 50                 |
|                     | <b>HOXB1</b>  | GAAACACAGGTCAAGATTTGGTT         | GGAAGCCCCATTGGTGGCTAGGT           | 205                       | 50                 |
|                     | <b>HOXB7</b>  | GAAAGACAGATCAAGATTTGGTT         | CTGGGCTTCTTCTCGTCTCCCTTTCTCATG    | 180                       | 175                |
|                     | <b>HOXB8</b>  | GAGAGACAGGTCAAAATCTGGTT         | CTTGTGCGCCCTTCTGCGCGTC            | 168                       | 250                |
|                     | <b>HOXB9</b>  | GAGAGACAAGTCAAAATCTGGTT         | GCACTGGCTTTGCGATCGTCACAT          | 156                       | 50                 |
|                     | <b>HOXB4</b>  | GAGCGCCAGATCAAGATCTGGTT         | CGCGGGGCTCCATTGGGC                | 142                       | 100                |
|                     | <b>HOXB13</b> | GAGCGCCAGATTACCATCTGGTT         | CCAGGACACCCCACTTTGCG              | 134                       | 50                 |
|                     | <b>HOXB6</b>  | GAGAGGCAGATCAAGATATGGTT         | CCAGCACCTTACTCGGCCTGTTTTTCTTCC    | 125                       | 50                 |
|                     | <b>HOXB2</b>  | GAAAGGCAGGTCAAAATCTGGTT         | GGTCGCAGATGCTCCAGGG               | 121                       | 250                |
|                     | 3             | <b>HOXC13</b>                   | GAGCGCCAGGTAACCATCTGGTT           | GCGCGGTTCTTCTTTCTTAACA    | 215                |
| <b>HOXC6</b>        |               | GAGCGACAGATCAAAATCTGGTT         | GGGAGAGAGGGGTGGCAGGGAC            | 195                       | 111                |
| <b>HOXC8</b>        |               | GAGAGACAAGTGAAGATCTGGTT         | GGGGTCTTCTTTTTTGGCTTAGTCCTTGT     | 180                       | 194                |
| <b>HOXC4</b>        |               | GAGAGGCAGATCAAAATCTGGTT         | GTGGTCTCAGAAGTACCCGGGGTA          | 150                       | 83                 |
| <b>HOXC12</b>       |               | GACCAGCAGGTCAAGATCTGGTT         | TTTGTCTCTGCCAGGGACAGG             | 142                       | 111                |
| <b>HOXC9</b>        |               | GAGCGGCAGGTCAAAATCTGGTT         | TTTCCCTTGGCTGTGCTGAGG             | 126                       | 56                 |
| <b>HOXC11</b>       |               | GACCGACAAGTGAAGATTTGGTT         | AAAGGGCCGGTCTGCAG                 | 118                       | 556                |
| <b>HOXC10</b>       |               | GACAGCAAGTCAAAATCTGGTT          | CGCTCTCAGGTGAAATTAATGGAGGT        | 110                       | 278                |
| <b>HOXC5</b>        |               | GAGAGACAGATCAAGATCTGGTT         | CCCCGCTGCCTCTAAAGAGCCT            | 95                        | 194                |
| 4                   |               | <b>HOXD4</b>                    | GAGCGCCAGATCAAGATCTGGTT           | CCAGGGTCCCCTTCTATAAGGTGCG | 201                |
|                     | <b>HOXD9</b>  | GAGAGACAGGTCAAAATCTGGTT         | CTGGAGAGTTTCTGGAATCAAGCACCACAAACA | 185                       | 278                |
|                     | <b>HOXD11</b> | GACCGGCAAGTCAAAATCTGGTT         | GAGCAGGCTGGTGGGAAGG               | 162                       | 194                |
|                     | <b>HOXD8</b>  | GAGAGACAGGTAATAATCTGGTT         | CTGTCTTCTCCAGCTCTTGGGC            | 140                       | 278                |
|                     | <b>HOXD13</b> | GAGAGACAAGTGACCATTGGTT          | GACAACCGAATGGCTTCTAAGCTGTC        | 130                       | 111                |
|                     | <b>HOXD10</b> | GACAGGCAGGTCAAGATTTGGTT         | TCAGACCGGCCTCAGACCTAAGA           | 122                       | 111                |
|                     | <b>HOXD1</b>  | GACACGCAAGTCAAAATCTGGTT         | GAAGTTGGAGGGGAGCCACAG             | 106                       | 111                |
|                     | <b>HOXD12</b> | GACCAGCAAGTCAAAATCTGGTT         | CACGCGCGGCTAGTAG                  | 98                        | 194                |
|                     | <b>HOXD3</b>  | GAACGCCAGATCAAGATCTGGTT         | ACTGGCTAGCCGGCAGTGCAGGATG         | 94                        | 278                |
|                     | 5             | <b>GBX1</b>                     | ACAGCATTTACCAGCGAGCAGCTT          | CCAGAACGGCTGCTCACATTGC    | 191                |
| <b>BARHL1</b>       |               | AGATCTCCAGCTCCAGGGACAGT         | TGCGTGTGCGGTGAGTTGAGCGA           | 175                       | 52                 |
| <b>MSX1</b>         |               | AAACACAAGACGAACCGTAAGCCG        | GGAACCATATCTTACCTGCGTCT           | 160                       | 202                |
| <b>HLXB9</b>        |               | CGCTCTCTACTCGTACCCGCA           | GAAGTCGGGCATCTTAGGCAGGAT          | 146                       | 433                |
| <b>NP_001009812</b> |               | GTGTCGAGGAGGGCGTCGGAGTTT        | GCGGCAGGCCTGTGAGTTGTTT            | 133                       | 29                 |
| <b>GBX2</b>         |               | GCTGATGATGATGCAGCGCCCG          | GGTAGCCGGTGTAGACGAAATGG           | 110                       | 577                |
| <b>DLX3</b>         |               | CATGGTGAATGGGAAGCCCAAGAA        | GTACTGGGCTTCTGGAAGCGG             | 100                       | 288                |
| <b>DLX1</b>         |               | AGTGGCTTCAATGGCAAGGGAAA         | CTGGAACCTCCCGTTCAAAGCCT           | 91                        | 87                 |
| <b>DLX6</b>         |               | AAGCCTCGGACATTTATTCCAGC         | TCTGGAAGGGCCAGATACTGTGT           | 83                        | 87                 |
| <b>DLX4</b>         |               | TCCGCAAGCCGAGGACCATCTACT        | AGGTACTGCGTGTGCTGGAAAC            | 76                        | 58                 |
| <b>DLX5</b>         |               | AGAAGACTCAGTACCTCGCCTTGC        | TGTGTTTGTGTAATCCAGCGAG            | 70                        | 87                 |
| <b>DLX2</b>         |               | AGAAGGAGGACCTTGAGCCTGAAA        | GGGTTCCGGACTTTCTTTGGCTT           | 65                        | 288                |
| <b>LBX1</b>         |               | GAGGAGCTGCCAGCAAGACGTTTA        | CTTCGGCTGCCTGCAGAACGCT            | 61                        | 346                |
| 6                   |               | <b>PAX7</b>                     | ACTCCATCAAGCCAGGAGACAG            | ATAACAAGCAGGAGGCCCTGG     | 193                |
|                     | <b>PAX1</b>   | CGGACGCCCTCAGTAGCTTACA          | ACTGGCTTCTCCTCCGCGAGT             | 177                       | 101                |
|                     | <b>PAX9</b>   | TACATGACCTACAGTGCTGCTCT         | GGAAGCCGTGACAGAATGACTACCTT        | 162                       | 46                 |
|                     | <b>PAX2</b>   | AATGGAGATTCCAGAGTGGTGTG         | CTGATTTGATGCTCTGATGCCTGG          | 148                       | 58                 |
|                     | <b>PAX3</b>   | GGCCAGCTGCAGTCAGAGACTAGA        | TACTGCCATATTGGTAGCCTGTG           | 135                       | 46                 |

|                  |                                |                              |     |     |
|------------------|--------------------------------|------------------------------|-----|-----|
| <b>PAX8</b>      | ATCCTCACTCACCCCTTCGCCATAA      | GAGCCGACTTGCTGCAGATCCAAA     | 112 | 101 |
| <b>PAX5</b>      | AGACTTCTCCGGAAGCAGATGCG        | GTGAAGATGTCTGAGTAGTGCCT      | 102 | 72  |
| <b>PAX4</b>      | AACCACCTGGGTCCCTCCTGCTAT       | AGGGCTTGAGACAGGCTTAGGT       | 93  | 52  |
| <b>PBX3</b>      | GCAAGTTTCAGGAAGAAGCCAACC       | TTGTTCTGCACAGCTGCTGCTACT     | 85  | 115 |
| <b>PBX4</b>      | GCGACGGAAGTGCTGAATGAGTAT       | CAGCTCTTCTTTGGCTTCTTCGCT     | 78  | 72  |
| <b>PAX6</b>      | TCGGTGAATGGGCGGAGTTATGAT       | CATTGGCTGACTGTTTCATGTGTGC    | 72  | 72  |
| <b>PBX2</b>      | GTCTCCAACCTGGTTTGGCAACAAGAG    | CCTCCTTTGGAACCTTCCGATGT      | 67  | 101 |
| <b>PBX1</b>      | CTATTCATCTCAGCAACCCTTACC       | CACCTCTTGGCTAACTCCTCTTTGGC   | 63  | 101 |
| <b>7</b>         |                                |                              |     |     |
| <b>NP_078843</b> | GCCTTGAAACTTTGGACCGTCTT        | TTGATTGGTAGTGCAAGGCTGTGG     | 213 | 35  |
| <b>CUTL1</b>     | ACAGCTCAGTCAGTGACAGCCA         | GTGGCGAGGTCTTCGATGGTTT       | 196 | 35  |
| <b>NP_775756</b> | CTCACCTGGGTTTCCAAATGAAGGAC     | GTTTGCTCACAAATGTCGACAGC      | 180 | 46  |
| <b>CUTL2</b>     | GGAAAGCATCCTGGGTCTGACA         | TCCAGTCTTCATATCCCTCAGC       | 165 | 58  |
| <b>TLX1</b>      | CGTCCTTACACGCGCTGCAGAT         | CACTTTGTCCGCGGTTCTGGA        | 151 | 58  |
| <b>TLX3</b>      | AGCTGCAACACGACGCCTTCCAAA       | TGACAGCGGGAACCTTGGAACTAT     | 138 | 288 |
| <b>LASS2</b>     | AAGATGAACGCAGTGACCGGGAA        | TCTTACGATGGTTGTTATTGAGGATGGG | 126 | 87  |
| <b>LASS4</b>     | ACACCACATACTACGAGTCCATCAGC     | AGAATGAGGCAAGACCAGAACACG     | 115 | 72  |
| <b>LASS1</b>     | AGGTCCTGTATGCCACCAGTCA         | AGAGGTTTCATAAGGGTGAGCAGCA    | 105 | 46  |
| <b>LASS5</b>     | AGCAGCTCAGAGGAAGAAGATGTG       | TCCCATGTGACCATTACCCGATT      | 96  | 46  |
| <b>LASS6</b>     | AGGACTCAGAACCTCCGGGAAGAAT      | GAGCCAGTCAGGAGATACCCGTT      | 88  | 52  |
| <b>TLX2</b>      | TTCCTGCGCCAGAAGTACCTGG         | TTTGACCTGTGCGTCGGTCATGC      | 81  | 577 |
| <b>LASS3</b>     | TGCACGCTGATCTTGCCTATGT         | GATCATGAGCTGTAGGTTGAGGAAGATG | 75  | 72  |
| <b>8</b>         |                                |                              |     |     |
| <b>HMX3</b>      | GAGATCATTCTGAGGAGAGCGACT       | AAGACTGTGCGCGTCTTCTTCTTG     | 182 | 231 |
| <b>MSX2</b>      | ATGGCTTCTCCGTCCAAAGGCAAT       | TTGTGCGACATGAGCGCCTCCA       | 167 | 231 |
| <b>NKX2-4</b>    | TCTTCTCGCAGGCGCAGGTCTAC        | GTTTCATCTTGACCGGTGTTCTGG     | 153 | 404 |
| <b>MIXL1</b>     | CGGAGATTATCCTCAACCACTGTGC      | ACCTTGGGAGCTAGAGTCAGAGAT     | 140 | 115 |
| <b>IRX2</b>      | GTGGACTCGCTCACGGATCACT         | TCGTCTCCAGGTCGTACTACTTGT     | 128 | 288 |
| <b>LHX4</b>      | ACTTTGTCTACCACCTGCACCTGCT      | TCTCGTAGTCTTCTTGCACACCA      | 117 | 58  |
| <b>ARX</b>       | CTGCTGAAACGCAACAGAGGC          | CTGGTGAAGACGTCGCGGTAGT       | 107 | 288 |
| <b>POU6F1</b>    | ATTGCTAAGGAGCTCAACTACGACCG     | TGAAAGACGTTTCAGCTTGTGGTG     | 98  | 58  |
| <b>EN2</b>       | CTCGGACTCGGACAGCTCGCAA         | TCCGAGTAGCGCGTACAGTAGA       | 90  | 404 |
| <b>GSH1</b>      | AAGTGTCCGAGGATGACGACGAAT       | TAGGAGTGACCGGTACAGTCCCG      | 83  | 87  |
| <b>TITF1</b>     | AAAGCACACGACTCCGTTCTCAGT       | CCTCCATGCCCACTTCTTGTAGCTT    | 77  | 144 |
| <b>POU4F1</b>    | TCGCCGAGAAACTGGACCTCAAAA       | GCTTCTGCTTCTGTCTCTGGTTGC     | 72  | 144 |
| <b>SHOX</b>      | TGAATGCAAAGAGAAGCGCGAGGA       | TCTGTTTCAGCTTGGTCTGCCCGT     | 68  | 115 |
| <b>9</b>         |                                |                              |     |     |
| <b>VSX1</b>      | AAGATAAGTTGGCAGGACTCTGGG       | GAGTTGGAGCCTCCTTGAGCAC       | 199 | 35  |
| <b>GBX2</b>      | ACTCAGCGAGGTGCAGGTGAAA         | GCCTGTTCTAGCTGCTGATGCT       | 183 | 87  |
| <b>LBX1</b>      | GGCCTTACCAACCACCAGATCTAT       | TCCTCCAGGTCCCGCTTGAGCTTAG    | 168 | 87  |
| <b>IPF1</b>      | TAGAGCTGGAGAAGGAGTTCCTATTCAACA | CCGCGCTTCTTGTCTCCTCCTTT      | 154 | 87  |
| <b>NKX2-8</b>    | GCCTACCAGCACTTAGCATCCC         | ACGGAGAGCGTTCACGGCGTTC       | 141 | 144 |
| <b>NKX3-1</b>    | TTACGCCATCAGAAGTACCTGTGC       | GGAGAGCTGCTTTCGCTTAGTCTT     | 129 | 144 |
| <b>BAPX1</b>     | GCTTTAACCCACGCGCTACCTGT        | CGCTTTGTCTTGTAGCGACGGTTC     | 118 | 202 |
| <b>VAX1</b>      | CCGTTAAACAATGGCTGGTTCGCTA      | CCCTTCTTTATTGTTGGTCCGGGAGT   | 108 | 231 |
| <b>DLX3</b>      | ATGGTGAATGGGAAGCCCAAGAAG       | GTAAGGCGCTTCTGGAAGCGG        | 99  | 144 |
| <b>NKX2-2</b>    | AGCACATGCAGTACAACGCCAGTACA     | CAAGTCCACTGCTGGGCTTGAC       | 91  | 87  |
| <b>TLX1</b>      | TTCCAGAAGAGCCTGGCACAGC         | ATTCTGCAGGGCGAAGAGCGACGA     | 78  | 404 |
| <b>HMX2</b>      | TCGACCTGAAGCGCTACCTGAGCA       | AGATCTAACCTGCGTCTCGGTGA      | 84  | 46  |
| <b>HMXB9</b>     | CTCAACAAGTACCTGTGCGGCCCAA      | CTGGGCTCCTGGTGCAGTGCAGC      | 69  | 144 |
| <b>10</b>        |                                |                              |     |     |
| <b>TLX3</b>      | GATCTTACAGTGTGAACCTGAGCCTAGC   | TGTGAAGCGGTCTTTCACGAAGC      | 200 | 231 |
| <b>BARX1</b>     | AGCAGGCGCGGTGTTCAAGTT          | TTCTTGGCTTTGGTGCCTGGCT       | 184 | 115 |
| <b>TLX2</b>      | GATGCTGGGTCCACACAACCTCCCA      | GTAGCCCGAGGCTCCGTGGTAT       | 169 | 173 |
| <b>LHX6</b>      | AGGAGCTCTGGACAAGGACGAG         | TGAGCAGATATCGGTCCAGGATCTC    | 155 | 87  |
| <b>ISL2</b>      | AGATCCACGACCAAGTTATCCTGC       | TAGGTCTTCCCGTCTCTCACGAA      | 130 | 173 |
| <b>SIX3</b>      | CTGTTGCGGGAGTGGTACCTACAG       | TGCCGCCGTTCTTAAACCAGTTGCC    | 119 | 87  |
| <b>SHOX2</b>     | AAATCAAGCAGAGGCGAAGTCGGA       | AGTTCTCTCGCATGAAGGCGT        | 109 | 115 |
| <b>PITX2</b>     | CGGCCGTTGAATGTCTTCTCCTAAA      | AAGAACTTGCTGCTGGCTGCCTCTT    | 100 | 87  |
| <b>HOP</b>       | TGCAGATCCGTCACAGACTAAGGA       | AGCTTGGTTAAGCGGAGGAGAGAA     | 92  | 72  |
| <b>NKX6-2</b>    | ACGACGACGAATACAACCGGCC         | TTCGAGGGTTTGTGCTTCTTGAGC     | 85  | 288 |
| <b>GSCL</b>      | TTCAAGAACCCTGGGCGCAAAAT        | ACTTCTTACGCGCGGCGAGGAG       | 79  | 115 |
| <b>EMX2</b>      | AGCTGGAGGAAGAAGGCTCAGATT       | GGCGATTCTCCACCGGTTAATATGGT   | 74  | 72  |
| <b>HHEX</b>      | AAAGGAAAGCGGCCAGGTGAGATT       | TGCGTCTCGAATTTCTTCTCCAGC     | 70  | 72  |

|    |                   |                                |                            |     |     |
|----|-------------------|--------------------------------|----------------------------|-----|-----|
|    | <b>POU3F1</b>     | TACGGTAACGTGTTCTCGCAGAC        | TCGATGGACGTGCGCTTCTTGC     | 191 | 469 |
|    | <b>POU3F2</b>     | AGCATAGACAAGATCGCAGCGCAA       | ACCAAATCTCACCACCTCCTTCT    | 175 | 250 |
|    | <b>POU6F2</b>     | GCCAAACTGAACCTGGCCCTTT         | CCCCGATAAACTCGGTGAGTTCT    | 160 | 63  |
|    | <b>POU6F1</b>     | TCGAGAAGCTAGACATCACACCCA       | TTTGCGTTTTCTGGAGGGCTCG     | 146 | 50  |
|    | <b>POU4F1</b>     | TGAACAAGCCTGAGCTCTTCAACG       | ATGGCGGCGATCTTCTCGGACG     | 133 | 250 |
|    | <b>POU4F2</b>     | GCTCACCAAGCCTGAACCTTCAA        | TTCAGAGGAGGGCCGAGGCTGAAT   | 121 | 188 |
|    | <b>POU2F1</b>     | TGCAACTGGGAACCTGGTATTTGC       | TAACAGGGTTGCTGGTGAGCAGA    | 110 | 63  |
|    | <b>POU3F4</b>     | ACGCATTTCTCAAGTGTCCCAAG        | TACAGAACCAGACACGCCACTT     | 100 | 156 |
|    | <b>POU2F2</b>     | CAGAGGAGATCCTGCTGATCGCCGAG     | CGTTTCTCCTTCTGGCGCCGTT     | 91  | 63  |
|    | <b>POU1F1</b>     | AGATGCTCTGGAGAGACACTTTGG       | CCAGATTGATTCTTTCAGCCATCCTC | 83  | 94  |
|    | <b>POU5F1/L/N</b> | TGGTCCGAGTGTGGTTCTGTAAC        | TCTCGTTGTGCATAGTCGCTGCTT   | 70  | 63  |
|    | <b>POU2F3</b>     | AAGGAGAAGCGAATCAACTGCCCT       | GGGAGTTGTAGACAGGTGGTTTGA   | 61  | 94  |
| 12 |                   |                                |                            |     |     |
|    | <b>ALX3</b>       | CTGAGGAGAAGACCTCCAAAGCTG       | AATGTGCTGAAGGTCGTGCGGTTA   | 211 | 94  |
|    | <b>VSX1</b>       | AGGAAGTGAAGATAAGTTGGCAGGAC     | AGGGTGCACCTTTCTTGGTCTCCT   | 178 | 50  |
|    | <b>CHX10</b>      | TCCCAGGAGGAAGTGGAGGAGAA        | TCTCCGCCGGCCTGTCTTCATC     | 163 | 56  |
|    | <b>ALX4</b>       | ATTCAGAACCCTGCTGGCTCG          | ACACTCAGGAAGTCGGTGACGCT    | 149 | 125 |
|    | <b>CART1</b>      | TCGCCTCGGACAGATTCCAGTTA        | CAAATGCATGTCCATTGGTTGCC    | 124 | 38  |
|    | <b>SHOX2</b>      | TACATGATGTTCCAGCACCGCCCTT      | TTGCTGGTGGTCTTGGCGGCTG     | 113 | 219 |
|    | <b>HESX1</b>      | CCCAATGCCAGAAGAAAGAGCTTC       | TGGTCTTCGGCCTCTATACCAACT   | 103 | 94  |
|    | <b>LMX1A</b>      | GAGTGCTGGGATGGAAGGAATCAT       | ATCTGAGCTGTAGACACTCTGCTCG  | 94  | 78  |
|    | <b>ISL2</b>       | CAGTGGAGGTGCAGACGTACCA         | TTGGAAGGCGGGTTGGTCCAGGT    | 86  | 78  |
|    | <b>ISL1</b>       | TGGCTTACAGGTAACCCAGTGGAA       | CAAGGCGAAGTCGCTCAGACTTT    | 73  | 125 |
|    | <b>LMX1B</b>      | GAGGGCATGATGGCTTCTTACA         | CTCTGTTCCATGGCCACGATCT     | 68  | 94  |
|    | <b>CXorf43</b>    | ACTGCTGTCAGATTTACCTCCTGAATTAGA | AGGCTCCAGTGAGGCATGATTGAAA  | 64  | 156 |
| 13 |                   |                                |                            |     |     |
|    | <b>PEPP2</b>      | AGGTCAAAGAGGAGGAAGAGGATGC      | CTTCCATAGGTGGCCAGGAACT     | 162 | 60  |
|    | <b>PITX2</b>      | ACCCGCTAAGAAGAAGCGGCAAA        | GCTTCGTAAGTTGGTCCACACA     | 148 | 375 |
|    | <b>PEPP1</b>      | CCGTGTTCTACTGCCTGAGTGTAT       | GGTTCATATTACCATGAGGCCTGGA  | 123 | 113 |
|    | <b>ESX1L</b>      | AGAAACTTACCGTGACCTCGCTGA       | GACCTTCCGTGCCAACGTTGTTT    | 112 | 75  |
|    | <b>O60393</b>     | ATCCTGACAGTGATAAACGCCGAG       | CACTCCACCCTGCCACCAGTGA     | 102 | 113 |
|    | <b>PITX3</b>      | CCCAGAGGACGGTTCGCTGAAA         | CTCTGGAAGGTGCGCTTAGCTC     | 93  | 263 |
|    | <b>Q9HB31</b>     | TGGAGAGGGCGTTTGCAGCATGG        | TTGGCCTCAGGAAGGCAAGTGA     | 85  | 75  |
|    | <b>PITX1</b>      | AGACGACCCAGCCAAGAAGAAGAA       | AGCTTTGCAACTGCTGGCTTGTGAA  | 72  | 188 |
|    | <b>PROP1</b>      | AGTCAGCCTTTGGGAGGAACCAGTA      | CCAGTGTCCCGGGCAAGACTCTCT   | 67  | 113 |
|    | <b>HOP</b>        | TCCTGGAGTACAACCTCAACAAGGTGC    | CGATGAGGCACAGCGTGGTGGAA    | 63  | 225 |
| 14 |                   |                                |                            |     |     |
|    | <b>DMBX1</b>      | TTATGTTCCAGCACCCGCAAACA        | CCTCAGGCAGGTTGGTGCACAT     | 149 | 60  |
|    | <b>RAX</b>        | CACCGGCGAAGCGAAACTGTCAGA       | GCTGTACACGTCGCGGTAGTGGGA   | 136 | 113 |
|    | <b>OTX2</b>       | CGTTCCTACTCGGGCGCAGCTAGA       | CCTCGACTCGGGCAAGTTGATTT    | 113 | 113 |
|    | <b>OTX1</b>       | CACCACCTTACGCGTTTACAG          | GTTGATCTTGGAGCGCCACCTCCT   | 103 | 68  |
|    | <b>NP_116142</b>  | AAGAAGAAGCACCGGAGGAACC         | ACACATCCGGGTAGTGAGAGGC     | 94  | 188 |
|    | <b>PRRX2</b>      | CACGTTCAACAGCAGCCAACTG         | CAAGCTCCTCGGCACAAAAGGC     | 86  | 113 |
|    | <b>PRRX1</b>      | AGCAGCGAAGGAATAGGACAACCT       | GGATAGTGTGTCGCTCAAAGACA    | 79  | 75  |
|    | <b>PHOX2B</b>     | CAAACCTTTCACGGACCACGGC         | ACTGGTGAAAGTGGTGCAGGATG    | 73  | 75  |
|    | <b>PHOX2A</b>     | TTCTTCCAGAGCCATCCGGCCT         | CTGGTGAACGTGGTGCAGGATGC    | 68  | 94  |
|    | <b>CRX</b>        | CACTGTTGCCAAGACCCAGTACC        | TTGATCTTACAGCCACCTCCTCA    | 64  | 75  |
| 15 |                   |                                |                            |     |     |
|    | <b>NKX3-1</b>     | CTCACGTCTTCTCATCCAGGACA        | CCGGTGCTCAGCTGGTCTGTTCT    | 161 | 703 |
|    | <b>BAPX1</b>      | TCAGCGAGGAGAACGAGAGCAG         | TTCTCTCTAGGTCTTTGGAAGCG    | 134 | 469 |
|    | <b>NKX2-3</b>     | ACTTCCACTCTGCGCCCTGCAT         | ATAGGACAATTTCTGCGCCCTGTC   | 101 | 56  |
|    | <b>HMX2</b>       | TTCGACCTGAAGCGCTACCTGA         | TGGAACCAGATCTTAACCTGCGTC   | 92  | 703 |
|    | <b>NKX2-6</b>     | AGTACCTGAGAATGGACGCAGAGC       | AACCATCCAGCTTTCTGTCACCG    | 84  | 75  |
|    | <b>NKX2-8</b>     | CTGGTTCCAGAAATCATCGCTACAAGC    | ATGCTGCCAGGTCAGGCGACTC     | 77  | 469 |
|    | <b>NKX2-5</b>     | TTCACCGGCCAAGTGTGCGTCT         | TCGCTGTAGGCACGTGGATAGAAGGC | 66  | 117 |
|    | <b>NKX2-2</b>     | TTCTACGACAGCAGCGACAACCCGTA     | TACTGAAGGCCCTCGGTGCTGG     | 62  | 117 |
| 16 |                   |                                |                            |     |     |
|    | <b>LHX2</b>       | CGGGACTTGGTTTATCACTCAACTG      | CACGTGGCATGGTTGAAGTGTG     | 165 | 56  |
|    | <b>LHX3</b>       | CCCAGGACTTCTGTGACCACCT         | CTCGCTGCTTGGCGGTTTCTGAGT   | 138 | 281 |
|    | <b>LHX5</b>       | TCATCCTGTACGGACCCGAGTTT        | GTTCTGCTCCTCGTTCTCGTTGTT   | 126 | 141 |
|    | <b>LHX1</b>       | CCCAGTTTGTCTCCGGATTCCCAA       | CCAGGTTCTGGTCTGTCATTCTCGTT | 115 | 94  |
|    | <b>LHX9</b>       | AAGACCAAGCGCATGCGAACCTCTTT     | AAGCTGCTTGAAGTCTTGGCAT     | 105 | 47  |
|    | <b>LHX6</b>       | GTTATGCAGGCGCAGTTGCGCAG        | CTGGATGACTCTCCGGCTGAGG     | 96  | 469 |
|    | <b>GSCL</b>       | GCCACCGCACCATCTTCAGCGA         | TCGCGCTACTCACGTCAGGATA     | 88  | 469 |
|    | <b>GSC</b>        | CACCAGATGCTGCCCTACATGAAC       | ACAGTGCAGCTGGTTGAGAAGC     | 75  | 234 |

|    |                  |                                |                                     |     |     |
|----|------------------|--------------------------------|-------------------------------------|-----|-----|
| 17 | <b>TGIF2</b>     | AAC TGGTTCATCAATGCCCGCGCGCG    | CTGGCCTGAGTGAAGCGGCAT               | 216 | 214 |
|    | <b>PBX3</b>      | AATTGGTTTGGCAACAACGAATCAG      | GGAATTTGGTGTGGTGGGCGAA              | 159 | 161 |
|    | <b>C10orf48</b>  | AATTGGTTTGTCTAATGCAAGACGTCG    | GAGTCATCACTGCTTACGCTAAGCCGT         | 137 | 107 |
|    | <b>PBX1</b>      | AAC TGGTTTGGAAATAAGCGAATCCG    | GCTTCCATGGGCTGACACATTGG             | 120 | 161 |
|    | <b>PBX2</b>      | AAC TGGTTTGGCAACAAGAGGATTCG    | CCTGGGTGACTGACACGGCG                | 103 | 107 |
|    | <b>PBX4</b>      | AAC TGGTTTGGCAACAAGAATCCG      | TCCACAGCCGTTTTACCGTGAAAT            | 92  | 107 |
|    | <b>TGIF2LX/Y</b> | AAC TGGTTTATCAATGCTCGCAGACG    | TGGCCATGATGGGGTCGTTTC               | 77  | 107 |
| 18 | <b>EVX2</b>      | GGATCAAGTGCGGCGCTACCGT         | GGTGGTTTCGGGCAGGTTGAGT              | 139 | 107 |
|    | <b>IPF1</b>      | TTCACCACCACCTCCCGGCTCA         | GACTTCATCCATGGGAAAGGCAGC            | 127 | 429 |
|    | <b>EVX1</b>      | CTTCACCCGAGAGCAGATTGCG         | TGATGGTGGTTTCCGGCAGGTTTA            | 116 | 107 |
|    | <b>GSH2</b>      | ACCCAATGGCAAAGAGGATGAGGA       | TTCAATCTCCGGAGTCGAGACA              | 106 | 321 |
|    | <b>VENTX2</b>    | TAAGGAGCCAAATACCTTGCGGG        | GTACTGGTGGTCTGGAAGACG               | 97  | 107 |
|    | <b>MEOX2</b>     | GGACAGCATTACCAAAGAGCAAATCAG    | TATCTCGTATCGCCTCAGTCTGGT            | 89  | 107 |
|    | <b>MEOX1</b>     | TGGAGGCAGAGTTTGCCATCATA        | CGCTCAGAGAGGTCAGGTTTAC              | 82  | 107 |
| 19 | <b>IRX1</b>      | ACCTGGTTCGCCAACGCGCGCCGGCG     | TCGCCATCGTGCTCGTCGATCT              | 191 | 125 |
|    | <b>IRX3</b>      | ACCTGGTTCGCCAACGCGCGCCGGCG     | CCTCCAGCTCTAGCTCGCGTTTG             | 163 | 250 |
|    | <b>IRX6</b>      | ACCTGGTTCGCCAACGCACGCCGGCG     | TTCTTTGGTGTGACGAGTTAGGCAGC          | 139 | 20  |
|    | <b>IRX5</b>      | ACCTGGTTCGCCAACGCGCGCCGGCG     | GGGCTCGTCTCGTCGTTCTTC               | 129 | 250 |
|    | <b>IRX2</b>      | ACCTGGTTCGCCAACGCGCGCCGGCG     | CGTCTTGCTTCTGGTAGCGTCG              | 118 | 625 |
|    | <b>IRX4</b>      | ACCTGGTTCGCCAACGCGCGCCGGCG     | TAGGGCCGCTTCTCGTCTGCG               | 92  | 125 |
| 20 | <b>POU4F2</b>    | GTCTGGTCTTGAACCCAGAGGCAGAA     | GCTCAGTTGTTGCTCGTTCGCG              | 219 | 250 |
|    | <b>POU4F1</b>    | GTGTGGTTTTTGAACCCAGAGACAGAA    | CCCCAAATGCAGGCAGGATAACG             | 179 | 250 |
|    | <b>POU1F1</b>    | GTTTGGTTTTTGAACCCGAGGCAGAG     | TGAGGAAGAGAAAGGAATGAAACGGGAGAA      | 155 | 100 |
|    | <b>POU4F3</b>    | GTCTGGTCTTGAACCCAGAGACAGAA     | GATAACCATCCCCGAACCCG                | 133 | 250 |
|    | <b>POU3F2</b>    | GTTTGGTTTTTGAACAGGAGACAGAA     | GAGTGTCCCTACTCCCCCGTACA             | 100 | 250 |
|    | <b>POU6F2</b>    | GTTTGGTCTTGAATAAGAGGCAAGC      | CTCCAAGGGACTGCCGTGGC                | 87  | 125 |
| 21 | <b>CDX1</b>      | GGCAAAGGAGCGCAAAGTGAACAA       | GCAGAAACTCCTTTTCACAGGCA             | 176 | 68  |
|    | <b>BARHL2</b>    | TTGCTGGCCGAGGCAGGGAAC TA       | AGGAGTCCGGTACATGCTGCTG              | 147 | 61  |
|    | <b>BARX2</b>     | GAAGCTGAAGAGAAGATGAACAGCCAGG   | TCTGGTGGCTCTGCCATCTCTAA             | 134 | 136 |
|    | <b>HLX1</b>      | AGCGTCTCTGCACCAACAACAG         | GCTGCTGAAGCTGAAACTATTGCC            | 122 | 102 |
|    | <b>HHEX</b>      | AGGTGCTTCTTTGGATAGCTCTCAATGTTG | TTATCGCCCTCAATGTCCACTTCC            | 111 | 102 |
|    | <b>NANOG</b>     | GACACTGGCTGAATCCTTCTCT         | TGGGCATCATGGAACCCAGAACAC            | 92  | 68  |
|    | <b>CDX4</b>      | TTTCAAGATCGCAGAGCCAAGGAGAG     | ACTTTGCACCGAGCCTCCACTATT            | 84  | 136 |
|    | <b>TCF2</b>      | AGTATTCCCACACCTCCCGGTTT        | CATGTTGGTGTGAGTGTACTGATGCTGC        | 77  | 102 |
|    | <b>TCF1</b>      | TACCAGAGCTCAGACTCCAGCAAT       | AAGGTCTCGATGACGCTGTGGTT             | 71  | 68  |
|    | <b>BARX1</b>     | TCGGAGCCGCACTGTGTTCAAC         | TTCTGCTTCTCGAAGCGTTTCTCC            | 66  | 205 |
|    | <b>CDX2</b>      | ATATCGAGTGGTGTACACGGACCA       | GACTGTAGTGAACCTCTTCTCCAGC           | 62  | 153 |
| 22 | <b>SIX5</b>      | CTCCATCCTGGTGAACGGGAGCTT       | AGAGAGGTCTTGGTCTCGCTGG              | 195 | 68  |
|    | <b>SIX4</b>      | ACTGGTCAAGACCTATTGTGCTGCC      | GTTAGCTACCGATTGCAGAACCAAACG         | 150 | 61  |
|    | <b>SIX6</b>      | CTCCAGCAGCAGGTCCTGTGAC         | ATGGAGATGGCTGAAGTGGCCG              | 137 | 55  |
|    | <b>SIX2</b>      | GAGAACAACGAGAACTCCAATTCTAACAGC | GGGCTGGATGATGAGTGGTCTG              | 125 | 85  |
|    | <b>SIX1</b>      | TCCTCTCCAACAAGCAGAACCAA        | AAGGACCAGTCTGGTCTGGACTTT            | 114 | 102 |
|    | <b>PKNOX2</b>    | ATGCTTGATGCCAGCAACCCAGAT       | GCGATGGAGTTGGCCAGAATCTTT            | 95  | 68  |
|    | <b>MEIS2</b>     | CACCCTGGAATGACTATGTCAGCA       | ATGAATGTCCATAACCTGTCCGCC            | 87  | 136 |
|    | <b>PROX1</b>     | GCATTACCTCTCAGCTCATCAAGTGG     | TTGACGTGCGTACTTCTCCATCTG            | 80  | 136 |
|    | <b>MEIS1</b>     | GCCACCGGTATATTAGCTGTTTGAAGGG   | TGATCCTCTTCTATCGTCTATCACC           | 74  | 170 |
|    | <b>PKNOX1</b>    | ACGTGGACAGCCTTCAGTCTCTGT       | CTGCCATCATGACCTGCTGCAC              | 69  | 68  |
|    | <b>MEIS3</b>     | CTCTCCAGTTCTGGTGGAGAAGAT       | CCCTCTTCTGTTTCGCCGTGCT              | 65  | 102 |
| 23 | <b>CDX2</b>      | ATCTGGTTTCAGAACCAGAGCAAA       | TGCAGGGAAGACACCGGACTCA              | 173 | 83  |
|    | <b>TCF1</b>      | AAC TGGTTTGGCAACCAGCGCAAAGA    | CCTTACTGGGGGAGAGGGCAGGT             | 154 | 83  |
|    | <b>HLX1</b>      | GTGTGGTTCAGAACCAGCGGATGAA      | GGCTGGGGCTCCTCTCGTCTGCTCG           | 142 | 50  |
|    | <b>CDX1</b>      | ATCTGGTTCCAAAACCGCGGGCAA       | GGCCCCCAGGGATGGCCCG                 | 130 | 83  |
|    | <b>CDX4</b>      | ATCTGGTTTCAGAATCGCAGAGCCAA     | CTGATGGAGTCAGAGTCACTTTGCACCGAGCCTCC | 107 | 83  |
|    | <b>HHEX</b>      | AGGTGAGATTCTCCAACGACCAGA       | ATCTTGGCCAGACGCTTCTCT               | 97  | 250 |
|    | <b>TCF2</b>      | AAC TGGTTTGGCAACCAGGAAGGA      | CAGGCTGTGAGTCTGGTTGGAGCTATAG        | 87  | 67  |
|    | <b>NANOG</b>     | ACCTGGTTCAGAACCAGAGAATGAA      | TGCGTCACACCATTGCTATTCTTC            | 80  | 125 |
|    | <b>HHEX</b>      | TGTGATCAGAGGCAAGATTTGCCAGTGAA  | GGGGAGGGCGAACATTGAGAGCTA            | 77  | 208 |
| 24 |                  |                                |                                     |     |     |

|                  |                            |                               |     |     |
|------------------|----------------------------|-------------------------------|-----|-----|
| <b>IRX3</b>      | AGGGAAACGCTTATGGGAGCGA     | GCGCCGTCTAAGTTCTCCAAATCG      | 181 | 250 |
| <b>IRX1</b>      | GCTCGCAGTATGAACTGAAGGACA   | CTTGAGCGTGCTGGTGCTCTCG        | 152 | 250 |
| <b>IRX5</b>      | ACACGAACTATGGCTCCTTCGGA    | TTCGGGTCTTTAGCCAAAGCGT        | 139 | 417 |
| <b>TGIF2LX/Y</b> | ACAGGCAGAGTTCTTGCCCTACCA   | CTTCTTCTGAAGGGTAGGCCTTAAACCG  | 127 | 188 |
| <b>TGIF2</b>     | AGCAGGACAAAGAGGACTTCAGCA   | AGTGTGCAGTAATGGGAGTGATGG      | 116 | 104 |
| <b>C10orf48</b>  | CAAGAGCAGCTTGTGAACCGTTACC  | AGATCCCAGTGGTTTCTTTGCCT       | 106 | 83  |
| <b>IRX6</b>      | CGAATCTACCCAACGCTCTGTCTCA  | ACTGCCAGCAGTCGACTATCGTA       | 97  | 208 |
| <b>IRX4</b>      | GCTGCAGGAGCACCGCAAGAAC     | AGACCTGTGTGAGGGTCATCTTGGT     | 89  | 83  |
| <b>TGIF</b>      | TTCCCTTGGACCTTTCTTCATCCG   | AGAATCTGCACAGACTCCTTGGGT      | 82  | 125 |
| <b>25</b>        |                            |                               |     |     |
| <b>CHX10</b>     | GTCTGGTTCCAGAACCGTCGAGCCAA | TGGCTGACTTGAGGATGGACTCG       | 142 | 188 |
| <b>ALX4</b>      | GTCTGGTTCCAGAACCGAAGGGCCAA | TCATATGCAGTGGAGAAGTGGGTTCCG   | 92  | 125 |
| <b>ALX3</b>      | GTCTGGTTCCAGAACCGCAGAGCCAA | CAGCCGTGAAGGGGTTCCGCCCCCTC    | 85  | 100 |
| <b>VSX1</b>      | GTCTGGTTTCAAACCGCAGGGCCAA  | CGTACTCGGCCATCACGCTGCT        | 79  | 188 |
| <b>CART1</b>     | GTTTGGTTTCAAATCGAAGGGCCAA  | GCTTTTCGCTTGTGTATTTGGCCATAAC  | 72  | 125 |
| <b>HESX1</b>     | ATTTGGTTTCAAATCGGCGTGCAAA  | CGCCATTAGAAACTGTGATTCTCTATGGG | 66  | 188 |
| <b>26</b>        |                            |                               |     |     |
| <b>POU6F1</b>    | GTCTGGTTCTGCAATCGGCGCCAGAC | GATGCACATGCACACGGTGGA         | 215 | 300 |
| <b>POU3F4</b>    | GTCTGGTTCTGTAATCGAAGACAAA  | TGGCAAGATGTGTCTGTTTTACGG      | 107 | 600 |
| <b>POU2F2</b>    | GTCTGGTTCTGCAACCGGCGCCAGAA | CTGTAGCTGGCCGGCTTCCCT         | 95  | 120 |
| <b>POU2F1</b>    | GTTTGGTTCTGTAACCGCGCCAGAA  | GCTTTAATAGGTGAGCTGCTGGTCCCAC  | 83  | 150 |
| <b>POU2F3</b>    | GTCTGGTTCTGCAACCGACGCCAAAA | TGTAGACAGGTGGTTTGATGGGTGTG    | 79  | 150 |
| <b>27</b>        |                            |                               |     |     |
| <b>EN1</b>       | ACCAAATACCCGAGACACGGCAA    | GGACGATCCGAATAACGTGTGCAGTA    | 137 | 125 |
| <b>NP_689781</b> | ACCTGGGTCTAGGCTTTGCTCA     | ATGCAGGAGTGTCTGCTTCTTCC       | 125 | 83  |
| <b>EMX2</b>      | AGTCGCTGGTGGCCAAGGACAG     | AGCCGTTGAGGAACGGATTTATGG      | 114 | 417 |
| <b>NP_940881</b> | TTGCCAGACACCCAGTTATTCCCT   | CCTTCTTGGTACTGAGAGGTCATGGT    | 104 | 104 |
| <b>VAX2</b>      | GAAATTGTCCTGCCTAAGGGCCTG   | AACTCCATCTCCAGGCGGTACA        | 95  | 167 |
| <b>VAX1</b>      | GCTCTATCGGCTGGAGATGGAGTT   | GAGAGGTTAAGCTGCCGGGCGA        | 87  | 333 |
| <b>EMX1</b>      | AGCGCGCCTTCGAGAAGAACCACTA  | CGTCTCGGAGAGGCTGAGACTG        | 80  | 104 |
| <b>NKX6-2</b>    | AACCTTCGAGCAGACCAAGTACC    | TCTCGGTCATGCCAGCGAGTA         | 74  | 625 |
| <b>NKX6-1</b>    | GCCCTGGAGAAGACTTTTCAACAA   | CGAATAGGCCAAACGAGCCCTCT       | 69  | 167 |
